# Supplementary material for: The influence of water on dielectric property in cocrystal compound of [orotic acid][melamine]·H2O
Source: Royal Society of Chemistry journal article supplement (doi:10.1039/c1ce05623a), 2011-01-01
Supplement: c1ce05623a.pdf [file c1ce05623a.pdf]

## Supporting Information for

### The Influence of Water on Dielectric Property in Cocrystal Compound [orotic acid][melamine]·H<sub>2</sub>O

Hao-Ran Xu, Qian-Chong Zhang, Yan-Ping Ren,\* Hai-Xia Zhao,\* La-Sheng Long, Rong-Bin Huang and Lan-Sun Zheng

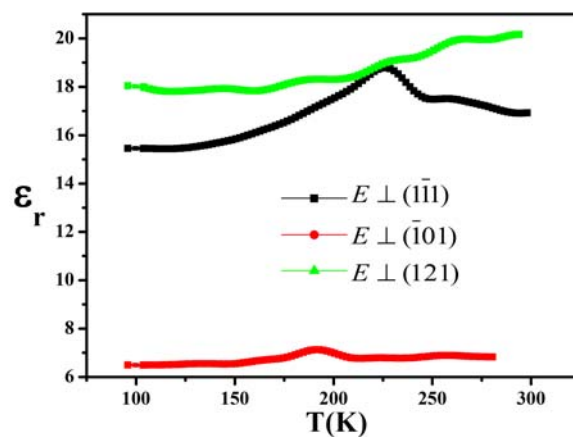

**Figure S1.** The dielectric constant of **1** measured at 1 kHz and different temperatures based on single crystal for  $E \perp (111)$ ,  $(\bar{1}01)$  and  $(121)$  respectively.

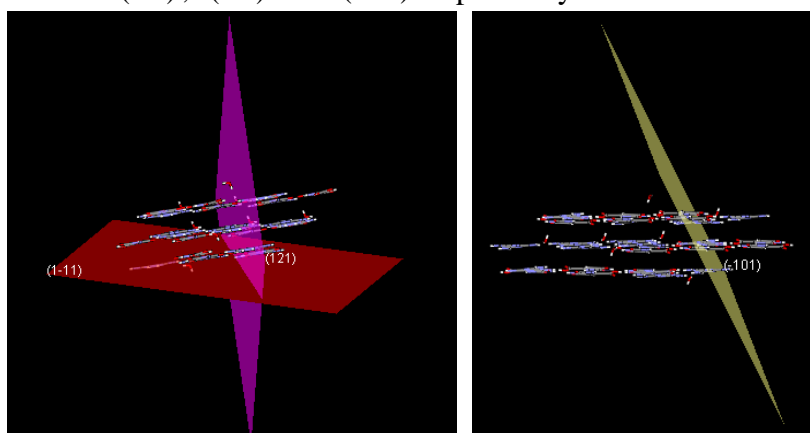

**Figure S2.** The plane  $(111)$ ,  $(121)$  and  $(\bar{1}01)$  are displayed in the layer structure.

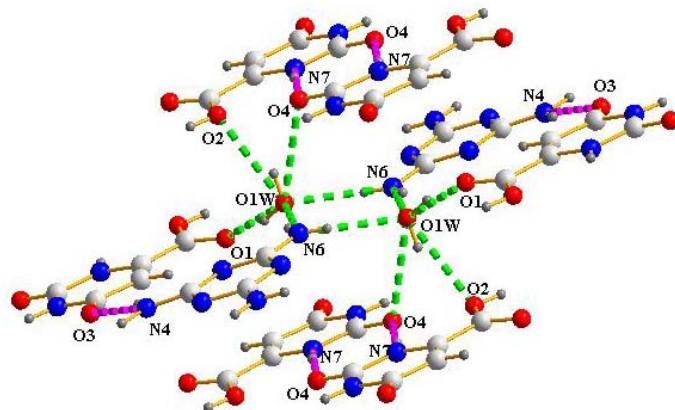

**Figure S3** The hydrogen bonding interactions of the water molecules with melamine and orotic acid ligands.

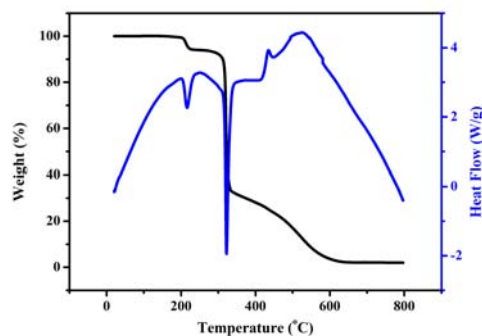

**Figure S4.** The TG-DSC curves for **1**.

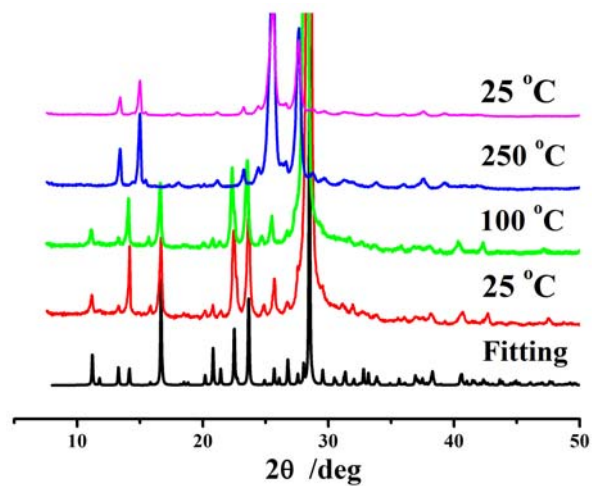

**Figure S5.** The XRD patterns of **1** at different temperatures. The upper patterns at 25 °C is obtained after heating up to 250 °C.

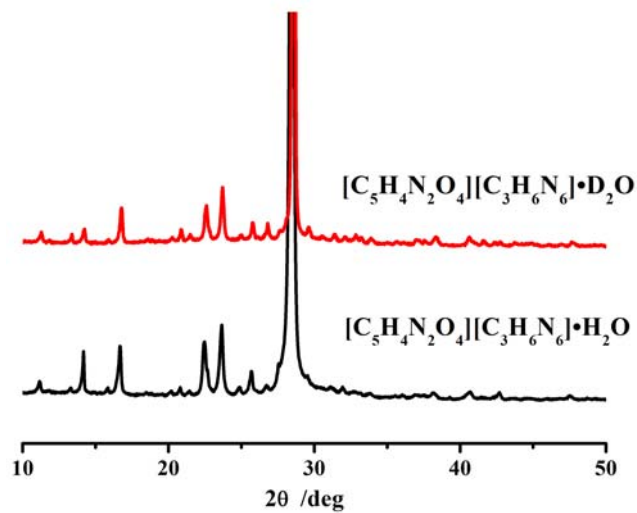

**Figure S6.** The XRD patterns of **1** and **1D** at room temperature.

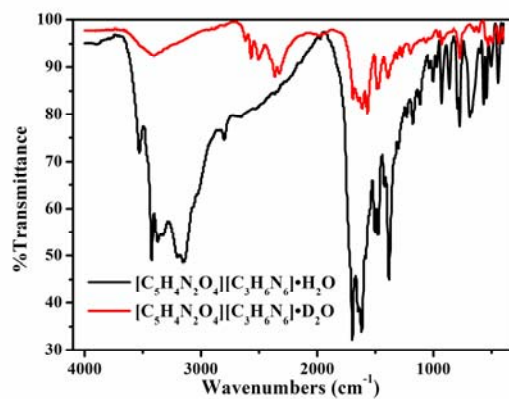

**Figure S7.** The IR spectrum of **1** and **1D**.

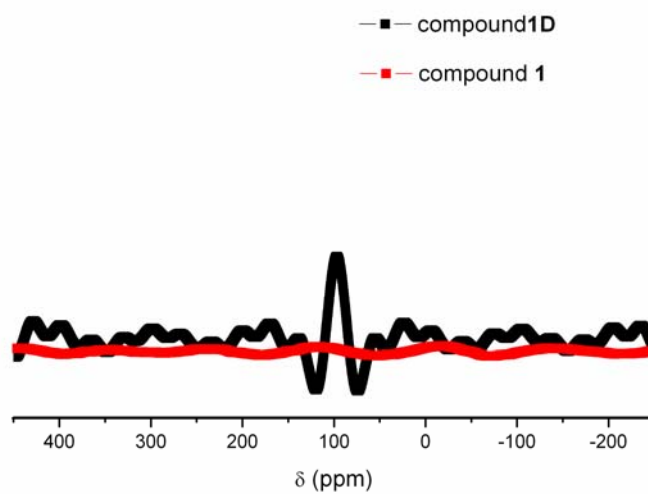

**Figure S8.** The solid <sup>2</sup>H-NMR spectra patterns of **1** and **1D**
